# Supplementary material for: Characterization of the biology and infectivity of Leishmania infantum viscerotropic and dermotropic strains isolated from HIV+ and HIV- patients in the murine model of visceral leishmaniasis
Source: PubMed Central journal article supplement (PMC3649922; doi:10.1186/1756-3305-6-122), 2013-04-26
Supplement: 1756-3305-6-122-S3.pdf [file 1756-3305-6-122-S3.pdf]

```

.....|.....| .....|.....| .....|.....| .....|.....| .....|.....|
          10          20          30          40          50
XM_001465758.2  MGAYCTKDSA  KEPQKRADNI  HKTTEANHRG  AAGVPPKHAG  GAMNDSAPKE
EF504255        -----ADNI  HKTTEANHRG  AAGVPPKHAG  GAMNDSAPKE
EF504256        -----ADNI  HKTTEANHRG  AAGVPPKHAG  GAMNDSAPKE
BIBIANO_K26    -----TKDSA  KEPQKRADNI  HKTTEANHRG  AAGVPPKHAG  GAMNDSAPKE
E390M_K26      -----TKDSA  KEPQKRADNI  HKTTEANHRG  AAGVPPKHAG  GAMNDSAPKE
HL_K26         -----TKDSA  KEPQKRADNI  HKTTEANHRG  AAGVPPKHAG  GAMNDSAPKE
ST_K26         -----TKDSA  KEPQKRADNI  HKTTEANHRG  AAGVPPKHAG  GAMNDSAPKE

```

```

.....|.....| .....|.....| .....|.....| .....|.....| .....|.....|
          60          70          80          90          100
XM_001465758.2  DGHTQKNDGD  GPKEDGRTQK  NDDGGPKEDG  HTQKNDGDGP  KEDGRTQKNN
EF504255        DGHTQKNDGD  GPKEDGHTQK  NDDGGPKEDG  HTQKNDGDGP  KEDGRTQKNN
EF504256        DGHTQKNDGD  GPKEDGRTQK  NDDGGPKEDG  HTQKNDGDGP  KEDGRTQKNN
BIBIANO_K26    DGHTQKNDGD  GPKEDGRTQK  NDDGGPKEDG  HTQKNDGDGP  KEDGRTQKNN
E390M_K26      DGHTQKNDGD  GPKEDGHTQK  NDDGGPKEDG  HTQKNDGDGP  KEDGRTQKND
HL_K26         DGHTQKNDGD  GPKEDGRTQK  NDDGGPKEDG  HTQKNDGDGP  KEDGRTQKNN
ST_K26         DGHTQKNDGD  GPKEDGRTQK  NDDGGPKEDG  HTQKNDGDGP  KEDGRTQKNN

```

```

.....|.....| .....|.....| .....|.....| .....|.....| .....|.....|
          110         120         130         140         150
XM_001465758.2  GDGPKEDGHT  QKNDGDAPKE  DGRTQKNDGD  GPKEDGRTQK  NDGDGPKEDG
EF504255        GDGPKEDGHT  QKNDGDAPKE  DGRTQKNDGD  GPKEDGRTQK  NDGDGPKEDG
EF504256        GDGPKEDGHT  QKNDGDAPKE  DGRTQKNDGD  GPKEDGRTQK  NDGDGPKEDG
BIBIANO_K26    GDGPKEDGHT  QKNDGDAPKE  DGRTQKNDGD  GPKEDGRTQK  NDGDGPKEDG
E390M_K26      GDGPKEDGRT  QKNNGDGPK  DGRTQKNDGD  GPKEDGRTQK  NDGDGPKEDG
HL_K26         GDGPKEDGHT  QKNDGDAPKE  DGRTQKNDGD  GPKEDGRTQK  NDGDGPKEDG
ST_K26         GDGPKEDGHT  QKNDGDAPKE  DGRTQKNDGD  GPKEDGRTQK  NDGDGPKEDG

```

```

.....|.....| .....|.....| .....|.....| .....|.....| .....|.....|
          160         170         180         190         200
XM_001465758.2  RTQKNDGDGP  KEDGRTQKND  GDGPKEDGHT  QKNDGDGPK  DGRTQKNDGG
EF504255        RTQKNDGDGP  KEDGRTQKND  GDGPKEDGHT  QKNDGDGPK  DGRTQKNDGG
EF504256        RTQKNDGDGP  KEDGRTQKND  GDGPKEDGHT  QKNDGDGPK  DGRTQKNDGG
BIBIANO_K26    RTQKNDGDGP  KEDGRTQKND  GDGPKEDGHT  QKNDGDGPK  DGRTQKNDGG
E390M_K26      RTQKNDGDGP  KEDGHTQKND  GDGPKEDGHT  QKNDGDGPK  DGRTQKNDGD
HL_K26         RTQKNDGDGP  KEDGRTQKND  GDGPKEDGHT  QKNDGDGPK  DGRTQKNDGG
ST_K26         RTQKNDGDGP  KEDGRTQKND  GDGPKEDGHT  QKNDGDGPK  DGRTQKNDGG

```

```

.....|.....| .....|.....| .....|.....| .....|.....| .....|.....|
          210         220         230         240         250
XM_001465758.2  GPKEDENLQQ  NDGNAQEKNE  DGHNVGDGAN  GNEDGNDDQP  KEQVAGN*..
EF504255        GPKE.....  .....  .....  .....  .....
EF504256        GPKE.....  .....  .....  .....  .....
BIBIANO_K26    GPKEDENLQQ  NDG.....  .....  .....  .....
E390M_K26      GPKEDGHTQK  NDGGGPKEDG  RTQKNDGDGP  KEDGHTQKND  GGGPKEDGRT
HL_K26         GPKEDENLQQ  NDG.....  .....  .....  .....
ST_K26         GPKEDENLQQ  NDG.....  .....  .....  .....

```

```

.....|.....| .....|.....| .....|.....| .....
          260         270         280
XM_001465758.2  .....  .....  .....
EF504255        .....  .....  .....
EF504256        .....  .....  .....
BIBIANO_K26    .....  .....  .....
E390M_K26      QKNDGDGPK  DGRTQKNDGG  GPKEDENLQQ  NDG
HL_K26         .....  .....  .....
ST_K26         .....  .....  .....

```
